# Supplementary material for: Ovarian Cancer Cells in Ascites Form Aggregates That Display a Hybrid Epithelial-Mesenchymal Phenotype and Allows Survival and Proliferation of Metastasizing Cells
Source: MDPI journal article supplement (doi:10.3390/ijms23020833), 2022-01-13
Supplement: s1 [file s1]

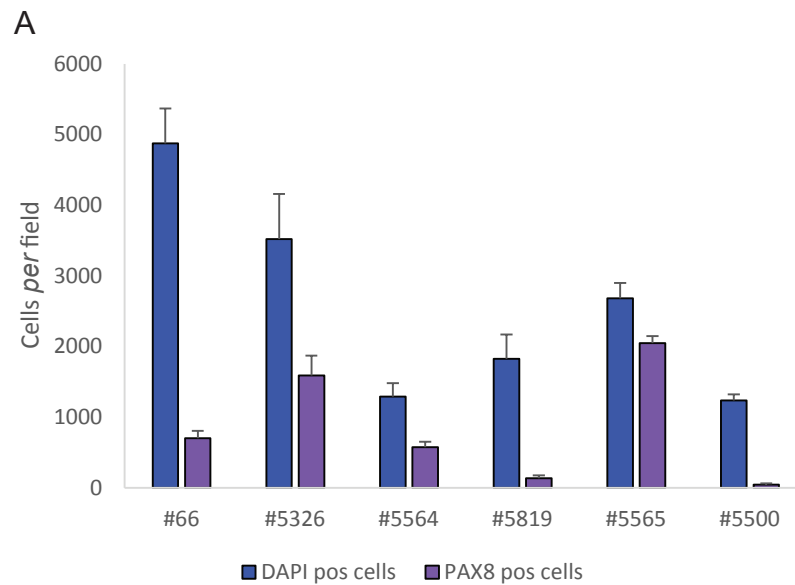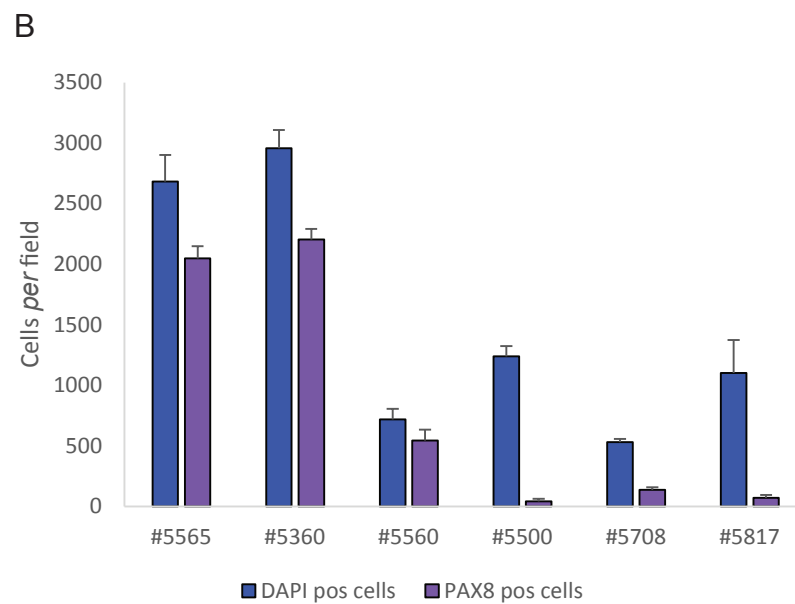

Supplementary Figure S1: Quantification (see Methods section) of HGS-EOC cells in the bulk ascites samples, based on PAX8+ staining, compared to the total number of cells/field based on DAPI staining. Numbers on correspond to the Profiling protocol numbers of the collected ascites. Details of each #case are in Supplementary Table 1. (A): six independent cases; (B) comparison of three successive withdrawals of ascites of the same two patients (details in Supplementary Table 1).
