# Supplementary material for: Ovarian Cancer Cells in Ascites Form Aggregates That Display a Hybrid Epithelial-Mesenchymal Phenotype and Allows Survival and Proliferation of Metastasizing Cells
Source: MDPI journal article supplement (doi:10.3390/ijms23020833), 2022-01-13
Supplement: s1 [file s1]

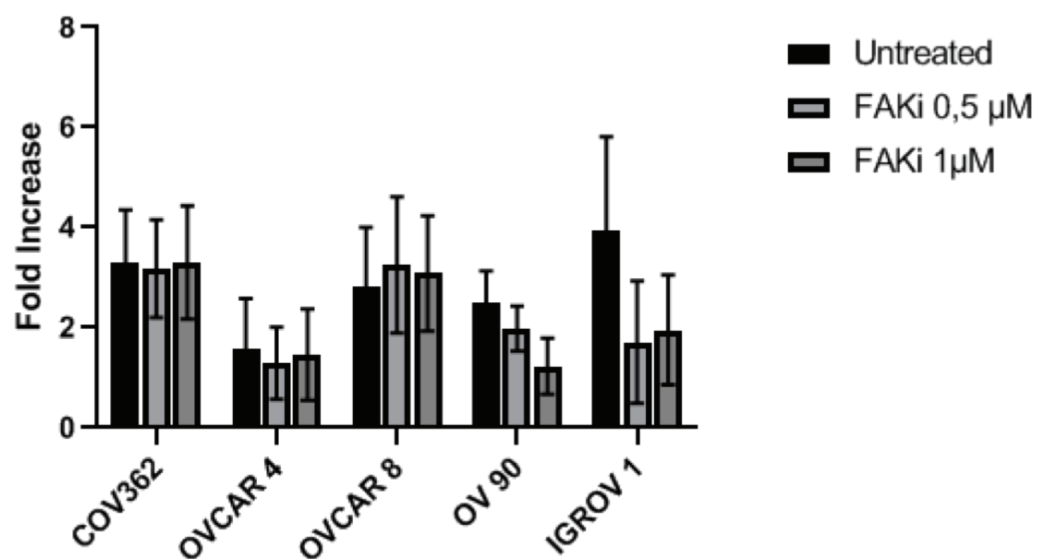

Supplementary Figure S4: CellTiterGlo assay to measure the proliferation of the listed ovarian cancer cell lines in the presence of the PDN-1186 FAK inhibitor (FAKi) at the indicated concentrations.
