# Supplementary material for: Ovarian Cancer Cells in Ascites Form Aggregates That Display a Hybrid Epithelial-Mesenchymal Phenotype and Allows Survival and Proliferation of Metastasizing Cells
Source: MDPI journal article supplement (doi:10.3390/ijms23020833), 2022-01-13
Supplement: s1 [file s1]

Table S1: clinical and pathological information of six patients analyzed

|   | A                            | B                        | C   | D                                 | E                          | F                          | G             | H                                  | I                                                            |
|---|------------------------------|--------------------------|-----|-----------------------------------|----------------------------|----------------------------|---------------|------------------------------------|--------------------------------------------------------------|
| 1 | Clinical/patient information |                          |     |                                   | Clinical/tumor information |                            |               |                                    |                                                              |
| 2 | patient ID                   | ascites ID/profiling no. | age | Alive/died of disease (DOD)/ lost | histology                  | Tumor grade classification | FIGO stage    | Is ascites from untreated patient? | chemotherapy: lines of treatment                             |
| 3 |                              |                          |     |                                   |                            |                            |               |                                    |                                                              |
| 4 | 1                            | #5326/#5421              | 80  | DOD                               | high-grade serous          | Grade 3                    | IIB           | YES/NO                             | Carboplatin/paclitaxel                                       |
| 5 | 2                            | 5564                     | 69  | Alive                             | high-grade serous          | Grade 3                    | IIIB          | NO                                 | Carboplatin/paclitaxel                                       |
| 6 | 3                            | #5565/#5360/#5560        | 73  | DOD                               | high-grade serous          | Grade 3                    | IV            | NO                                 | Carboplatin/paclitaxel                                       |
| 7 | 4                            | #5500/#5708/#5817        | 58  | DOD                               | high-grade serous          | NA                         | IV (clinical) | NO                                 | Carboplatin-Paclitaxel (first line);<br>Caelyx (second line) |
| 8 | 5                            | #5819                    | 64  | Alive                             | high-grade serous          | Grade 3                    | IV            | YES                                | Carboplatin/paclitaxel                                       |
| 9 | 6                            | SAN66                    | 68  | DOD                               | clear cell                 | Grade 3                    | IV (clinical) | NO                                 | Carboplatin/paclitaxel                                       |
