# Supplementary material for: Ovarian Cancer Cells in Ascites Form Aggregates That Display a Hybrid Epithelial-Mesenchymal Phenotype and Allows Survival and Proliferation of Metastasizing Cells
Source: MDPI journal article supplement (doi:10.3390/ijms23020833), 2022-01-13
Supplement: s1 [file s1]

A

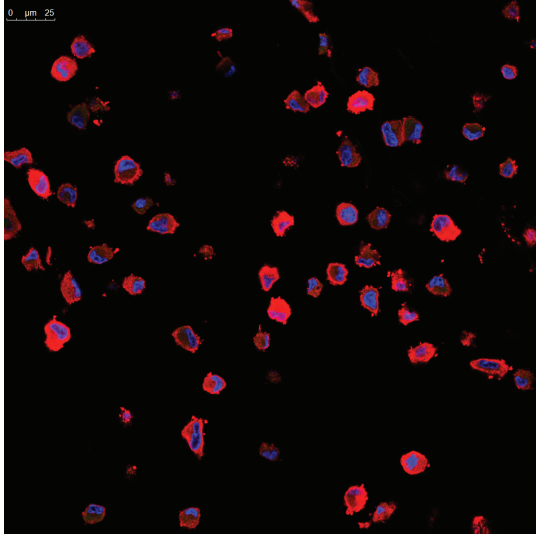

B

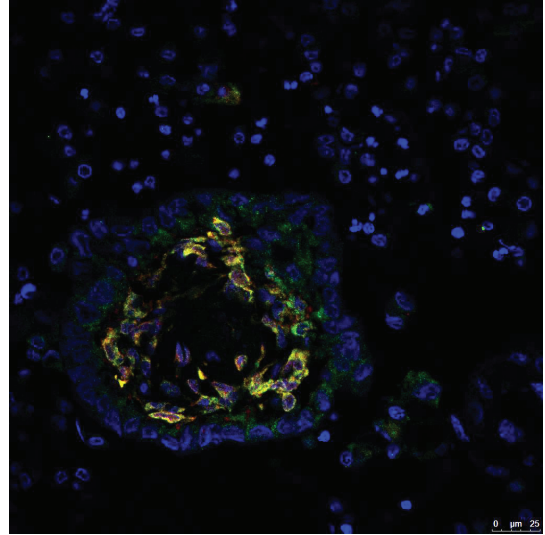

Supplementary Figure S2: Control staining to assess the specificity of  $\alpha$ SMA MAbs. (A) IF staining of commercially available hu-man fibroblasts (BJ-5ta CRL-4001<sup>TM</sup>) with  $\alpha$ SMA MAbs conjugated with AlexaFluor<sup>®</sup>555. (B) Staining of ascites spheroids with the same  $\alpha$ SMA and with a different primary MAbs followed by secondary an-ti-mouse MAb conjugated with Alexa Fluor<sup>®</sup>488. Nuclei were stained with DAPI.
