# Supplementary material for: Ovarian Cancer Cells in Ascites Form Aggregates That Display a Hybrid Epithelial-Mesenchymal Phenotype and Allows Survival and Proliferation of Metastasizing Cells
Source: MDPI journal article supplement (doi:10.3390/ijms23020833), 2022-01-13
Supplement: s1 [file s1]

#5326

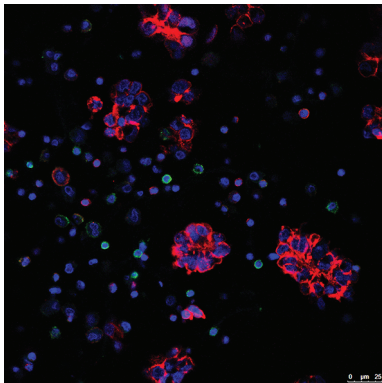

#5565

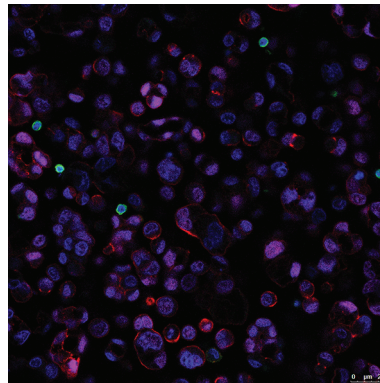

#5819

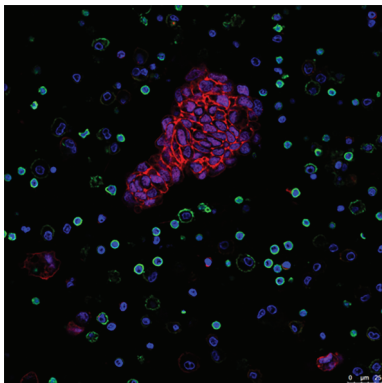

#SAN66

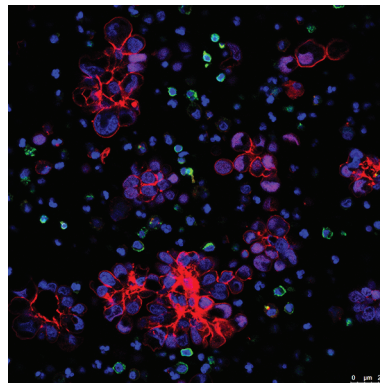

PAX8 CD45  $\alpha$ SMA DAPI

Supplementary Figure S3: IF staining of bulk ascites sections to show CD45 positive cells.
